# Supplementary material
Source: publisher figshare collection journal article supplement (https://gsajournals.figshare.com/ndownloader/files/15051548)
Supplement: Supplementary file 1 [file 15051548]

## Sheet: Table S4
Table S4. Enriched GO terms identified in downregulated genes in cisplatin-treated versus vehicle-treated tg melanoma medaka.
Database	Name	ID	fold enrichment; p-val
biological process	mitotic cell cycle	GO:0000278	O=8;E=1.17;R=6.82;rawP=1.03e-05
	cell cycle	GO:0007049	O=10;E=2.09;R=4.77;rawP=1.31e-05
	cell cycle phase	GO:0022403	O=8;E=1.29;R=6.19;rawP=2.11e-05
	ruffle assembly	GO:0097178	O=2;E=0.01;R=166.25;rawP=6.01e-05
	GDP-mannose metabolic process	GO:0019673	O=2;E=0.01;R=166.25;rawP=6.01e-05
	cell cycle process	GO:0022402	O=8;E=1.60;R=5.01;rawP=9.57e-05
	positive regulation of cell cycle process	GO:0090068	O=4;E=0.24;R=16.84;rawP=8.23e-05
	M phase of mitotic cell cycle	GO:0000087	O=5;E=0.57;R=8.77;rawP=0.0002
	nuclear division	GO:0000280	O=5;E=0.55;R=9.04;rawP=0.0002
	mitosis	GO:0007067	O=5;E=0.55;R=9.04;rawP=0.0002
cellular component	spindle	GO:0005819	O=4;E=0.31;R=12.73;rawP=0.0002
	cytosol	GO:0005829	O=10;E=3.20;R=3.13;rawP=0.0005
	lateral plasma membrane	GO:0016328	O=2;E=0.04;R=46.34;rawP=0.0008
	condensed chromosome, centromeric region	GO:0000779	O=2;E=0.12;R=16.85;rawP=0.0062
	midbody	GO:0030496	O=2;E=0.11;R=17.45;rawP=0.0058
	cytoskeletal part	GO:0044430	O=6;E=1.74;R=3.46;rawP=0.0060
	condensed chromosome kinetochore	GO:0000777	O=2;E=0.11;R=17.87;rawP=0.0055
	kinetochore	GO:0000776	O=2;E=0.14;R=14.26;rawP=0.0086
molecular function	small GTPase regulator activity	GO:0005083	O=2;E=0.37;R=5.38;rawP=0.0524
	GTPase regulator activity	GO:0030695	O=3;E=0.55;R=5.41;rawP=0.0169
	GTPase activator activity	GO:0005096	O=2;E=0.31;R=6.41;rawP=0.0382
	lipid binding	GO:0008289	O=3;E=0.92;R=3.25;rawP=0.0619
	nucleoside-triphosphatase regulator activity	GO:0060589	O=3;E=0.57;R=5.27;rawP=0.0181
	cytoskeletal protein binding	GO:0008092	O=3;E=0.79;R=3.78;rawP=0.0426
	chromatin binding	GO:0003682	O=2;E=0.39;R=5.11;rawP=0.0575
	enzyme activator activity	GO:0008047	O=2;E=0.51;R=3.95;rawP=0.0898
	enzyme regulator activity	GO:0030234	O=3;E=1.21;R=2.47;rawP=0.1174
